# Supplementary material for: Surface plasmon resonance enhanced band-edge emission of CdS–SiO2core–shell nanowires with gold nanoparticles attached
Source: Royal Society of Chemistry journal article supplement (doi:10.1039/c2tc00088a), 2012-10-30
Supplement: c2tc00088a.pdf [file c2tc00088a.pdf]

## Support information

### **Surface plasmon resonance enhanced bandedge emission of CdS-SiO<sub>2</sub> core-shell nanowires with gold nanoparticles attachment**

Pengfei Guo, Jinyou Xu, Xiujuan Zhuang, Wei Hu, Xiaoli Zhu, Hong Zhou, Lijuan Tang and Anlian Pan\*

Key Laboratory for Micro-Nano Physics and Technology of Hunan Province, State Key Laboratory of Chemo/Biosensing and Chemometrics College of Physics and Microelectronics Science, Hunan University, Changsha, 410082 (China)

*E-mail:* [anlian.pan@hnu.edu.cn](mailto:anlian.pan@hnu.edu.cn).

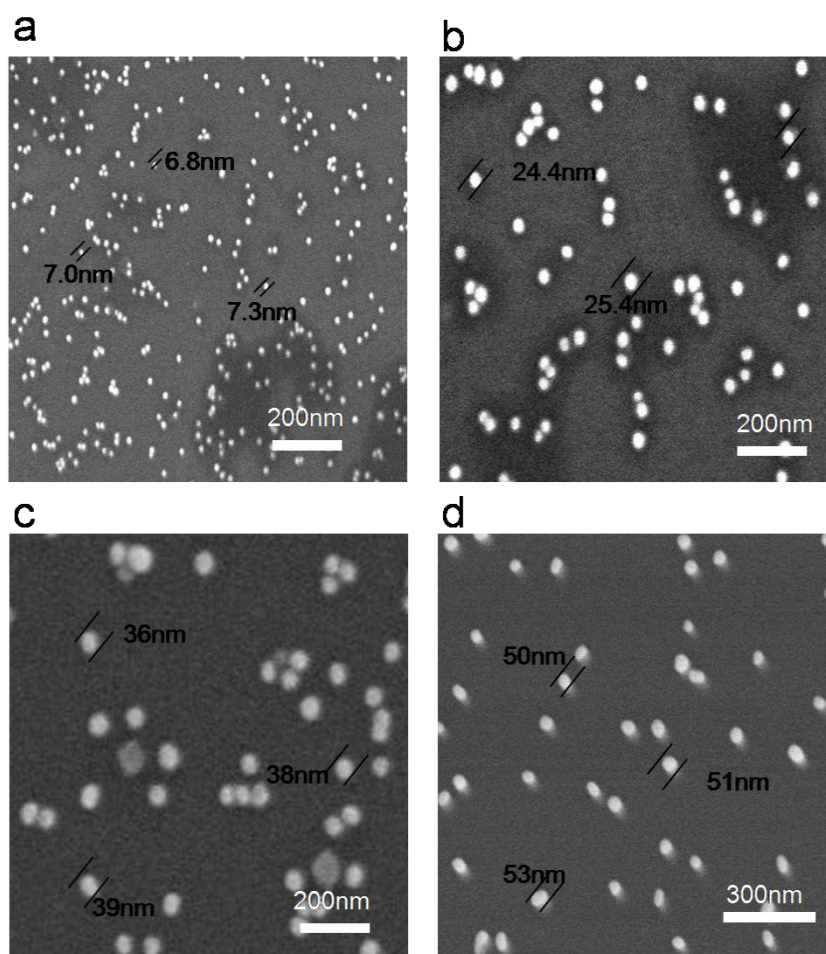

Figure S1 SEM images of gold nanoparticles with different size ~7 nm (a), ~25 nm (b), ~37 nm (c), ~52 nm (d), respectively.

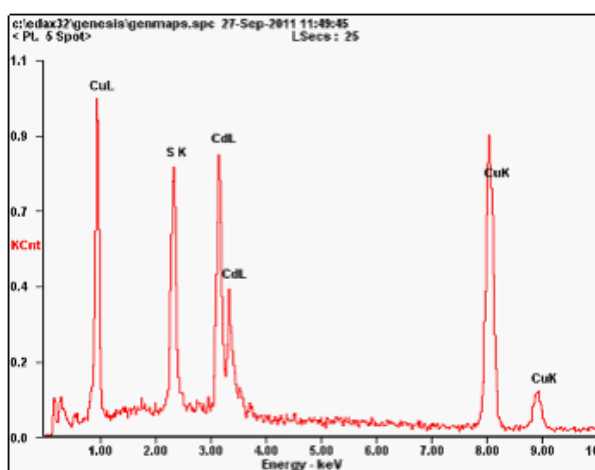

Figure S2 The EDS spectrum of as-prepared CdS NWs. (The observation of Cu comes from the Cu micro grid used for SEM test)

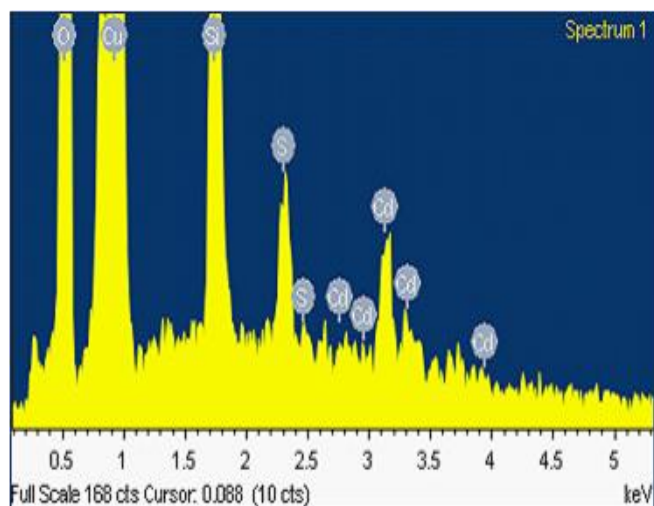

Figure S3 The EDS spectrum of as-prepared CdS-SiO<sub>2</sub> NWs. (The observation of Cu comes from the Cu micro grid used for SEM test)

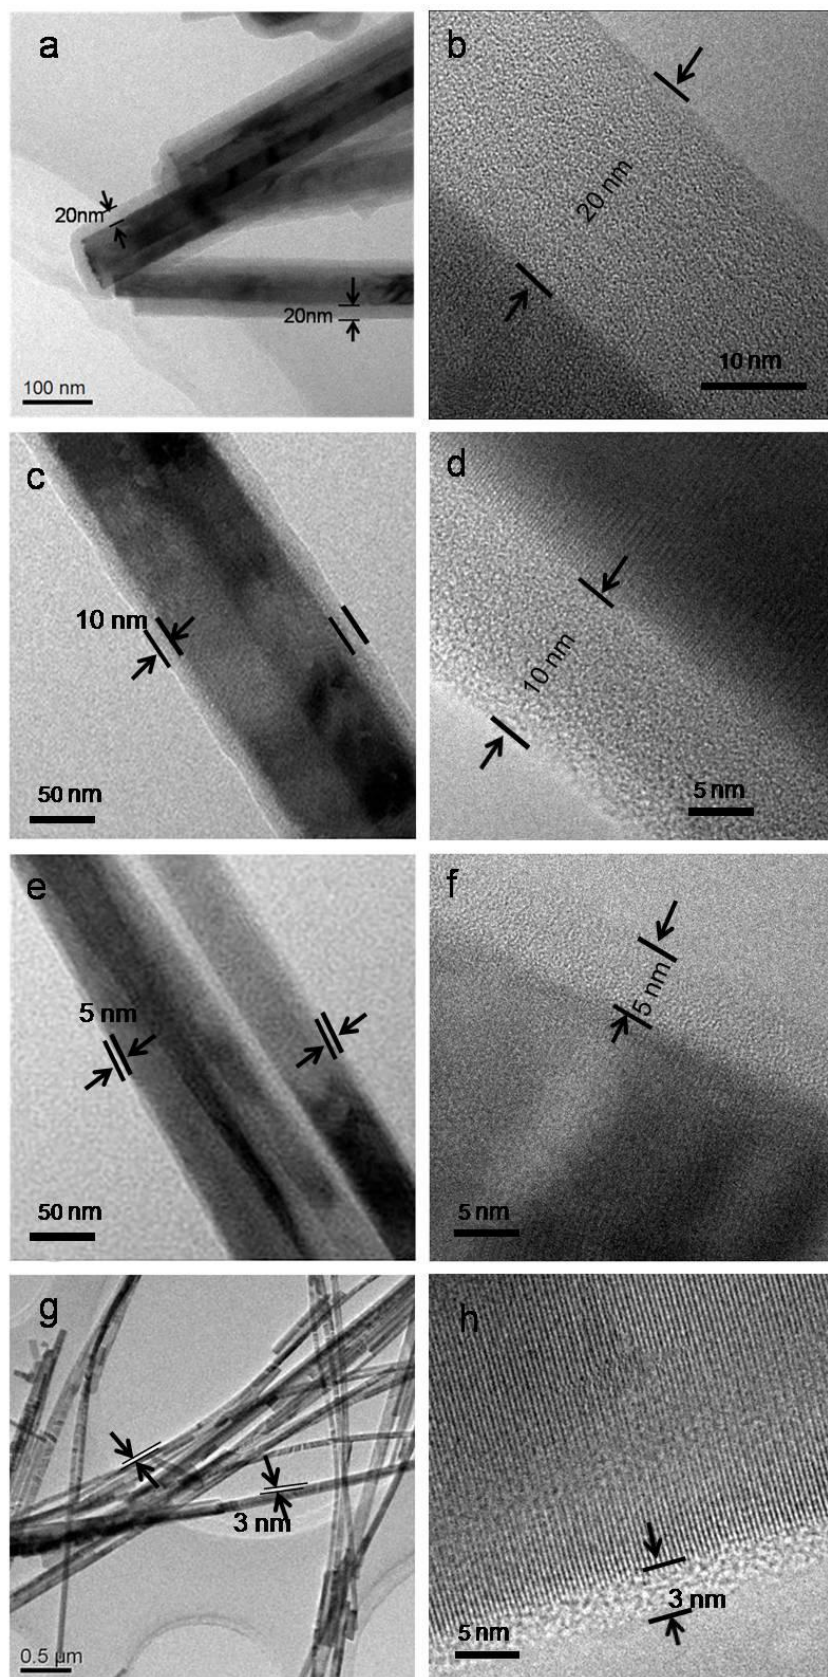

Figure S4 TEM images of CdS nanowires coating with different thicknesses of silica layers
